# Supplementary material
Source: Springer Nature journal article supplement (https://www.springermedizin.de/resource/supplementary/12936_2012_2213_MOESM1_ESM.pdf/9542826)

**A.**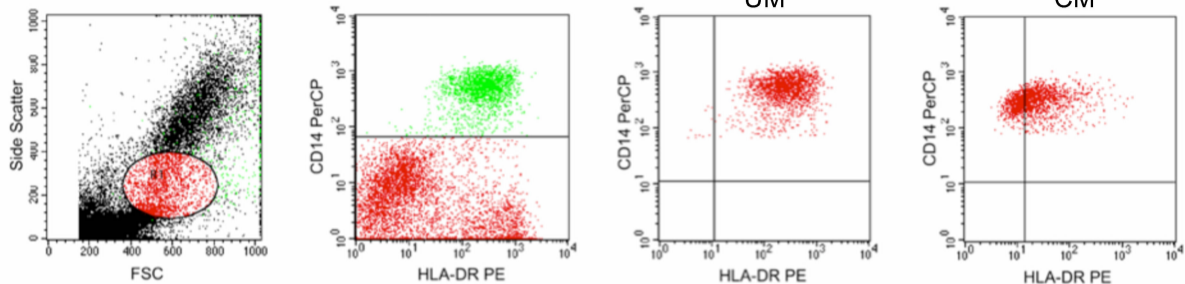**B.**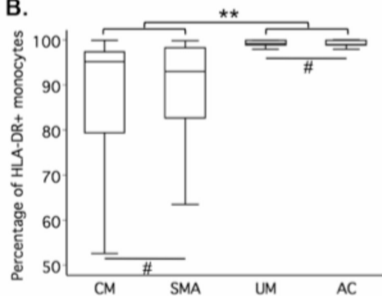**C.**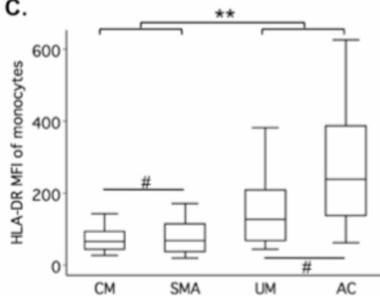**D.**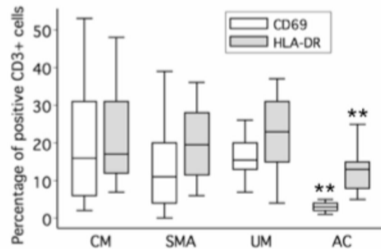

Supplement: MOESM1 [file 9542826]
